# Supplementary material
Source: PubMed Central journal article supplement (PMC7472587)
Supplement: 13045_2020_954_MOESM1_ESM.pdf [file 13045_2020_954_MOESM1_ESM.pdf]

## SUPPLEMENTAL MATERIAL

### Expanded materials and methods

#### Study design of patients with COVID-19

For this study, we recruited 589 patients who were suspected of COVID-19 aged from 18 to 74 years, with symptoms of fever, cough, sputum, muscle pain and other symptoms at the first affiliated hospital of Zhengzhou University, Henan Province, China and three centers of affiliated hospital of Anhui Medical University, Anhui Province, China, from January 10 through March 18 in 2020. Of these 589 patients, 422 patients were identified as SARS-CoV-2 infection by meeting one or both criteria of chest computerized tomography (CT) manifestations and reverse transcription-polymerase chain reaction (RT-PCR). The remaining 167 patients without COVID-19 served as non-COVID-19 group. We used the following inclusion and exclusion criteria to further determine the COVID-19 group and non-COVID-19 group.

For COVID-19 group, the inclusion criteria included patients with COVID-19, aged from 18 to 74 years, who were admitted to the above-mentioned hospitals in Henan and Anhui, China from Jan 10 to Mar 18, 2020. The exclusion criteria included 1, patients with incomplete data or transferred to other hospitals; 2, acute lethal organ injury (e.g., acute myocardial infarction, acute coronary syndrome, or acute pulmonary embolism,); 3, decompensated or end stage of chronic organ dysfunction (e.g., decompensated cirrhosis, decompensated chronic renal insufficiency, or severe congestive heart failure); 4, immunosuppression (acquired immune deficiency syndrome, chemotherapy, high

1 doses of immunosuppressive agents); 5, presence of malignancy, pregnancy or  
2 breastfeeding. After excluding, 181 COVID-19 participants were excluded, and 241  
3 COVID-19 participants comprising 184 mild and moderate, and 57 severe, and  
4 critically severe were included.

5 Severity of illness was divided into mild, moderate, severe, and critically severe; and  
6 severity was determined by a team consisting of three experienced clinicians using the  
7 Chinese Clinical Guidance for COVID-19 Pneumonia Diagnosis and Treatment (7th  
8 edition). Briefly, the criteria for disease severity determination were as follows: 1, Mild  
9 cases: the clinical symptoms were mild, and there was no sign of pneumonia on imaging;  
10 2, Moderate cases: showing fever and respiratory symptoms with radiological findings  
11 of pneumonia; 3, Severe cases: adult cases meeting any of the following criteria: (1)  
12 Respiratory distress ( $\geq 30$  breaths/ min); (2) Oxygen saturation  $\leq 93\%$  at rest; (3)  
13 Arterial partial pressure of oxygen ( $\text{PaO}_2$ )/fraction of inspired oxygen ( $\text{FiO}_2$ )  $\leq$   
14  $300\text{mmHg}$  ( $1\text{mmHg} = 0.133\text{kPa}$ ); 4, critically severe cases meeting any of the following  
15 criteria: (1) Respiratory failure and requiring mechanical ventilation; (2) Shock; (3)  
16 With other organ failure that requires ICU care.

17 For non-COVID-19 group, the inclusion criteria included patients without COVID-19,  
18 aged from 18 to 74 years, who were admitted to the above-mentioned hospitals in  
19 Henan and Anhui, China from Jan 10 to Mar 18, 2020, because suspected of COVID-  
20 19. The exclusion criteria are same as COVID-19 cohort. After excluding, 107  
21 participants were excluded, and 60 participants were included.

1 For healthy group, 201 volunteers >18 years of age were recruited for a reproducibility  
2 study of platelet activation. Exclusion criteria included (1) history of cardiovascular  
3 disease; (2) use of medications known to affect platelet function, including non-  
4 steroidal anti-inflammatory drugs (NSAIDs), anti-histamines, and selective serotonin  
5 reuptake inhibitors, during the 2 w prior to baseline phlebotomy; (3) history of chronic  
6 kidney and liver disease, or any known hemorrhagic diathesis. After excluding, 35  
7 participants were excluded, and 166 participants were included.

8 The demographic, clinical and laboratory data were extracted from the patients' medical  
9 records. The platelet and coagulation related laboratory data were collected, including  
10 platelet counts, mean platelet volume (MPV), plateletcrit (PCT), platelet distribution  
11 width (PDW), prothrombin time (PT), prothrombin time activity (PTA), international  
12 normalized ratio (INR), activated partial thromboplastin time (APTT), fibrinogen,  
13 thrombin time (TT), D-dimer, and fibrinogen degradation products (FDPs).

14 Thrombocytopenia was defined as platelet count less than  $125 \times 10^9$  per liter.

15 The study was approved by the Ethics Committee of the First Affiliated Hospital of  
16 Zhengzhou University (2020-KY-121) and Ethics Committee of Anhui Medical  
17 University (2020-AH-114), and complied with the Declaration of Helsinki and good  
18 clinical practice guidelines. All participants provided written informed consent.

19 **Viral RNA detection in blood**

20 The viral RNA in blood was detected as previously [1]. Plasma from patients was  
21 separated from the whole blood by centrifugation at 1000 g for 20 min. Viral RNA was

1 extracted with Nucleic Acid Isolation Kit (Da'an Gene Corporation, Cat: DA0630,  
2 Hangzhou, China) on an automatic workstation Smart 32 (Da'an Gene Corporation,  
3 China) following the guidelines. Real-time reverse transcriptional polymerase chain  
4 reaction (RT-PCR) reagent (Da'an Gene cooperation, Cat DA0930) was employed for  
5 viral detection per the protocol. In brief, two PCR primer and probe sets, which target  
6 orflab (FAM reporter) and N (VIC reporter) genes separately, were added in the same  
7 reaction tube. Positive and negative controls were included for each batch of detection.  
8 Samples were considered to be viral positive when either or both set(s) gave a reliable  
9 signal(s). A cycle threshold value less than 40 is interpreted as positive.

#### 10 **Animal studies**

11 The wild-type C57BL/6 mice and hACE2 transgenic mice (Cat No. T037657) were  
12 purchased from Jiangsu Gempharmatech, China. Male mice were 8–10 weeks old  
13 unless otherwise stated and housed in specific pathogen-free facilities. Animal  
14 procedures were approved by the Ethical Committee of Zhengzhou University and were  
15 conducted according to the NIH Guide for the Care and Use of Laboratory Animals  
16 (NIH Publication No. 85-23, revised 1996).

17 Platelet transfusion studies: wild-type male mice were exposed to  $\gamma$ -irradiation from a  
18  $60^{Co}$  source (Shanghai Institute of Radiology, Fudan University) to induce  
19 thrombocytopenia with platelet counts <5% of normal after 5-6 days. Mice were  
20 anesthetized with ketamine (90 mg/kg) and xylazine (15 mg/kg), and donor platelets  
21 were isolated from wild-type or hACE2 transgenic male mice, and stained with 2  $\mu$ g/ml



1 calcein AM (Molecular Probes, Junction City, OR, USA) for 15 min at room  
2 temperature. Total  $10^9$  platelets resuspended in 200  $\mu$ l saline, which brought circulating  
3 platelets to a normal range were injected into the thrombocytopenic mice through the  
4 jugular vein 2 h prior to FeCl<sub>3</sub> injury.

5 Mice platelets were prepared as described previously [2]. Briefly, mice were  
6 anesthetized with ketamine (90 mg/kg) and xylazine (15 mg/kg), and blood was  
7 collected from the abdominal aorta of pentobarbital sodium-anesthetized mice into  
8 syringes containing 3.8% citrate (9:1). Platelet-rich plasma was filtered through a  
9 Sepharose 2B column and isolated platelets were resuspended in Tyrode's buffer.

## 10 **Materials**

11 SARS-CoV-2 Spike Protein (40589-V08B1), SARS-CoV-2 Spike Protein S1 Subunit  
12 (40591-V08H) and SARS-CoV-2 Spike Protein S2 Subunit (40590-V08B) were from  
13 Sino biological (Beijing, China). DAPI and rhodamine-labeled phalloidin were from  
14 Beyotime (Shanghai, China). ADP, thrombin, collagen and luciferase were from  
15 Chrono-Log (PA, USA). Fibrinogen and apyrase were from Sigma (St Louis, USA).  
16 Ficoll-Paque™ Plus was from GE Healthcare (Uppsala, Sweden). The PF4 (ab189573),  
17 TNF- $\alpha$  (ab181421), IL-8 (ab214030), Factor V (ab137976) and Factor XIII (ab108836)  
18 ELISA kits were provided by Abcam (Cambridge, MA, USA). IL-1 $\beta$  (HSLB00D)  
19 ELISA kit was provided by R&D (Minneapolis, MN, USA). The anti-Spike monoclonal  
20 rabbit antibody (40592-R001) targeting the receptor-binding domain (RBD) of SARS-  
21 CoV-2 with 0.11  $\mu$ g/mL of IC<sub>50</sub> on 293T-ACE2 cells infected with SARS-CoV-2 Spike

1 pseudovirus was from Sino biological (Beijing, China). The primary antibodies and  
2 dilutions used were listed in the **Additional file 1: Online Table 1**.

### 3 **Washed platelets and peripheral blood mononuclear cells (PBMCs) isolation**

4 All blood donors had antecubital veins allowing a clean venepuncture and denied taking  
5 any medication during the 2 weeks preceding venepuncture. Blood was drawn without  
6 stasis into siliconized vacutainers containing 1/9 v/v 3.8% sodium citrate, then  
7 centrifuged at 150 g for 20 min and the platelet-rich plasma (PRP) was collected and  
8 diluted 3-fold in ACD (75 mM sodium citrate, 39 mM citric acid and 135 mM dextrose,  
9 pH 6.5) containing 0.1 U/ml apyrase and centrifuged for 10 min at 800 g. [The platelet-](#)  
10 [poor plasma was collected and](#) the platelet pellet was then resuspended in Tyrode's  
11 buffer (137 mM NaCl, 12 mM NaHCO<sub>3</sub>, 2 mM KCl, 0.34 mM Na<sub>2</sub>HPO<sub>4</sub>, 1 mM MgCl<sub>2</sub>,  
12 5.5 mM glucose, and 5 mM HEPES; pH 7.4) at the concentration of 3×10<sup>8</sup> platelets/mL.  
13 For platelet ACE2 and TMPRSS2 expression study, platelet-rich plasma prepared as  
14 previously described was filtered through a Sepharose 2B column (Sigma-Aldrich)  
15 equilibrated in Tyrode's solution to isolate platelets [2]. PBMCs were isolated within 2  
16 h by centrifugation on a Ficoll-Paque (15 min, 800 g), then washed twice with PBS.  
17 Cell concentration was determined using Mindray (BL-2800vet, Shenzhen, China).  
18 Blood collection was approved by the Ethics Committee of Zhengzhou University and  
19 carried out according to the guidelines and regulations. Informed consents were  
20 obtained from all the volunteers.

### 21 **Platelet aggregation and ATP release**

1 Agonist-induced platelet aggregation and ATP release from dense granules were  
2 measured using Chrono-Lumiluciferin-luciferase reagent and Chrono-Log  
3 aggregometer (Chrono-Log, Havertown, PA, USA) as previously described [3]. To  
4 explore the effects of SARS-CoV-2 and its Spike protein on platelet function, SARS-  
5 CoV-2 ( $1 \times 10^5$  PFU [4]) or Spike protein (2  $\mu\text{g}/\text{mL}$  [5, 6]) was added to platelets for  
6 indicated times before agonist-induced stimulation.

### 7 **Spreading**

8 Coverslips (20 $\times$ 20 mm) were coated overnight with 100  $\mu\text{g}/\text{mL}$  fibrinogen in 0.1 M  
9  $\text{NaHCO}_3$  (pH 8.3) at 4  $^\circ\text{C}$ . 200  $\mu\text{L}$  of washed platelets ( $2 \times 10^7/\text{mL}$ ) were allowed to  
10 spread on the fibrinogen-coated surfaces at 37 $^\circ\text{C}$  for designated duration. Slides were  
11 rinsed three times with PBS, fixed, permeabilized, and stained with rhodamine-labeled  
12 phalloidin. Adherent platelets were viewed with a fluorescence microscope (Olympus  
13 BX53, Tokyo, Japan). Images were acquired using a Retiga R1 QImaging camera. The  
14 platelet-covered area was measured using ImageJ [2].

### 15 **Clot retraction**

16 Clot retraction in platelet suspension was assayed as described previously [2]. Briefly,  
17 2 mg/mL fibrinogen was added to the platelets at a concentration of  $4 \times 10^8/\text{mL}$  in  
18 Tyrode's solution, and platelet suspension was dispensed in 0.3 mL aliquots into  
19 cuvettes. Clot retraction was initiated by the addition of 1 U/mL thrombin and allowed  
20 to proceed at 37 $^\circ\text{C}$ . Clot retraction was monitored by taking photographs at indicated  
21 time points using a digital camera. Sizes of retracted clots on photographs were

1 quantified using NIH Image J software.

## 2 **Cell culture**

3 The human colon cell line Caco-2 (ATCC Cat No. HTB-37) and the human lung cell  
4 line Calu-3 (ATCC Cat No. HTB-55) were cultured in Minimal Essential Medium  
5 (MEM) supplemented with 10% fetal bovine serum (FBS). The human prostate cell line  
6 PC-3 (ATCC Cat No. CRL-1435) was cultured in Ham's F-12K (Kaighn's) Medium  
7 with 10% FBS. The human cervical carcinoma cell line HeLa (ATCC Cat No. CCL-2)  
8 was cultured in Dulbecco's minimal essential medium (DMEM) supplemented with 10%  
9 FBS. All cells were collected and processed for RNA and protein extraction.

## 10 **SARS-CoV-2 virus preparation and incubation**

11 SARS-CoV-2 virus was isolated from a COVID-19 patient in Shanghai (GenBank  
12 accession No. MT121215) and propagated in Vero E6 cells [7]. Supernatant from the  
13 SARS-CoV-2 infected cells was aliquoted and stored at -80°C until use. The  
14 supernatant from mock-infected cells was used as a control. For platelet function study,  
15 around 300 µL platelets were incubated with  $1 \times 10^5$  PFU of SARS-CoV-2 in Tyrode's  
16 buffer. The infectious titers have been used in other cells. All experiments involving  
17 live SARS-CoV-2 virus were performed in a biosafety level-3 (BLS-3) laboratory [4].

## 18 **Reverse Transcription Polymerase Chain Reaction**

19 Total RNA was isolated from different cells and 1 µg of RNA was reversely transcribed  
20 to cDNA using a RNA isolation kit (TaKaRa, Kyoto, Japan) and polymerase chain  
21 reaction (RT-PCR) kit (TaKaRa, Kyoto, Japan), respectively [2]. PCR reactions were

1 performed with specific primers in the **Additional file 1: Online Table 2.**

## 2 **Flow cytometry analysis**

3 Flow cytometry was conducted as previously described [8]. For platelet activity test in  
4 COVID-19 patients, non-COVID-19 patients and healthy volunteers, the whole blood,  
5 drawn from healthy volunteers or from patients within 24 h of admission, was collected  
6 into sterile acid-citrate-dextrose Vacutainer tubes. The first 3 mL of blood was discarded,  
7 and samples with gross hemolysis or clotting were not used. Whole blood was diluted  
8 in Tyrode's buffer (1 : 9) and then co-stained with PE-CD41 or FITC-CD41, a selective  
9 marker of platelets, and the anti-human monoclonal antibody FITC-PAC-1, or PE-  
10 CD62P, or FITC-Annexin V. Samples were then incubated at 25°C in the dark for 10  
11 min and analyzed immediately with a flow cytometer (BD-Accuri 6, BD Biosciences,  
12 CA, USA) and selected by gating CD41 positive events.

13 For measurement of leukocyte-platelet aggregates, 20 µL of anticoagulant blood was  
14 transferred into a FACS tube and diluted with 80 µL of PBS at room temperature [9].  
15 After incubation with SARS-CoV-2 ( $1 \times 10^5$  PFU) or Spike protein (2 µg/mL) during  
16 staining with antibodies against CD45, CD65, CD14, and CD41 for about 20 min in the  
17 dark, 1 ml RBC Lysis/Fixation Buffer (Biolegend, California, USA) was then added  
18 and incubated for about 25 min. After washing, samples were then acquired by flow  
19 cytometry (Beckman Coulter Navios, USA).

20 For ACE2 and TMPRSS2 surface expression, after incubated with primary antibody  
21 (ACE2, TMPRSS2 or Rabbit IgG) for 30 min at room temperature, cells ( $1 \times 10^6$ ) were

1 washed with PBS twice, and stained with secondary antibody for 1 h at room  
2 temperature. After washing with PBS, the cells were resuspended with 400  $\mu$ L PBS for  
3 flow cytometer analysis.

4 For platelet activity test in SARS-CoV-2 virus or Spike protein-treated platelets, Flow  
5 cytometry was conducted as previously described [7]. Briefly, 300  $\mu$ L platelets  
6 ( $3 \times 10^8$ /mL) were challenged with SARS-CoV-2 virus ( $1 \times 10^5$  PFU in 300  $\mu$ L) or Spike  
7 protein (2  $\mu$ g/mL) for the indicated times. Platelets were diluted to final concentration  
8 of  $1 \times 10^6$ , then labeled with PE-CD41 or FITC-CD41, a selective marker of platelets,  
9 and FITC-PAC-1 or PE-CD62P, in Tyrode's buffer for 30 min at room temperature.  
10 Platelets were analyzed immediately with a flow cytometer (BD-Accuri 6) and selected  
11 by gating CD41 positive events. For PS exposure experiment, platelets were stained by  
12 PE-CD41 and Annexin V-FITC in Tyrode's buffer for 30 min. The samples were  
13 analyzed immediately with a flow cytometer (BD-Accuri 6). Data were analyzed using  
14 BD-Accuri 6 software and FlowJo X. The primary antibodies and dilutions used were  
15 listed in the **Additional file 1: Online Table 1**.

## 16 **Electron microscopy**

17 **Sample Preparation:** Platelet morphology incubated with SARS-CoV-2 for scanning  
18 electron microscope (SEM) and transmission electron microscopy (TEM) were  
19 conducted as previously described [10]. Briefly, platelets in 6-well plates were  
20 incubated with  $1 \times 10^5$  PFU of SARS-CoV-2 in Tyrode's buffer at constant rotation for  
21 30 min and 3 h at 37 °C, and washed three times with PBS to remove virus, then

1 subjected to SEM and TEM, respectively.

2 **Scanning Electron Microscopy (SEM)** [10]: Platelets were fixed with a 2.5%  
3 glutaraldehyde in Sorenson Phosphate buffer (0.1 M, pH 7.4) for 2 h. After fixation,  
4 platelets were washed three times in PBS (pH 7.4) for 5 min, and then fixed with 1%  
5 Osmium tetroxide in 0.1 M PBS (pH 7.4) for 1 h. Samples were rinsed, and dehydrated  
6 in a graded series of alcohol (30%, 50%, 75%, 85%, 95%, 100%), and critical point  
7 dried. The SEM procedure was completed by mounting the platelets on a specimen stub  
8 and then gold/palladium sputter coated. The samples were examined with a SU8100  
9 scanning electron microscope (Hitachi High-Technologies, Japan).

10 **Transmission Electron Microscopy (TEM)** [11]: Platelets were fixed with a mixture  
11 of 2.0% paraformaldehyde and 2.5% glutaraldehyde in 0.1 M Sorensen's phosphate  
12 buffer (pH 7.4) for 2 h. After fixation, platelets were washed, and post-fixed with 1%  
13 osmium tetroxide in 0.1 M PBS. Samples were dehydrated in a graded series of ethanol  
14 (30%, 50%, 75%, 85%, 95%, 100%), and embedded in Epon 812. Ultrathin sections  
15 (70 nm) contrasted with uranyl acetate and lead citrates were examined using a H-7650  
16 transmission electron microscope (Hitachi High-Technologies, Japan).

### 17 **Immunoblotting**

18 Platelets were lysed with 2 × lysis buffer (50 mmol/L Tris and 150 mmol/L NaCl, pH  
19 7.4) containing 2 × protease inhibitor and 2 × phosphatase inhibitor. Proteins were  
20 separated by sodium dodecyl sulfate-polyacrylamide gel electrophoresis, and  
21 visualized by enhanced chemiluminescence and imaged with Tanon 5200muti (Tanon

1 Science, Shanghai, China) after incubation with the corresponding secondary  
2 antibodies. The primary antibodies and dilutions used in these assays are listed in the  
3 **Additional file 1: Online Table 1.**

#### 4 **Co-immunoprecipitation**

5 Washed platelets subjected to different treatment were lysed with equal volumes of  
6 chilled 2 × NP-40 lysis buffer (100 mM Tris-HCL pH 7.4, 300 mM NaCl, 2 mM NaF,  
7 2% NP-40, 2 mM EDTA, and 2 × protease and phosphatase inhibitor solution) on ice  
8 for 30 min. The supernatants were then precleared using protein A/G-agarose beads for  
9 3 h at 4°C and then centrifuged. Immunoprecipitation was carried out using anti-  
10 phospho-Ser/Thr antibody for 2 h and then incubated with protein A/G-agarose beads  
11 overnight on rocker at 4°C. The beads were then harvested and rinsed 3 times with 1 ×  
12 NP-40 lysis buffer. Bead-captured ACE2 was detected by immunoblotting. The  
13 primary antibodies and dilutions used in these assays are listed in the **Additional file 1:**  
14 **Online Table 1.**

#### 15 **Confocal microscopy**

16 Platelets were attached to Poly-L-Lysine-coated coverslip and fixed with precooled  
17 methanol for 10 min. After washing twice in phosphate-buffered saline, platelets were  
18 blocked with 10% BSA in PBS. The platelets were then incubated with the primary  
19 antibodies and appropriate secondary antibodies in 0.15% saponin. Confocal images  
20 were captured in multitracking mode on a LSM510 Meta laser-scanning confocal  
21 microscope (Carl Zeiss, Dublin, California, USA) [12]. The primary antibodies and



1 dilutions used in these assays are listed in the **Additional file 1: Online Table 1**.

## 2 **ELISA assays**

3 PF4, TNF- $\alpha$ , IL-8, IL-1 $\beta$ , Factor V and Factor XIII concentrations were determined  
4 using commercial ELISA kits according to manufacturer's instructions. Briefly, the  
5 supernatant was prepared by centrifuge and added into the appropriate wells with  
6 antibodies for 1 h at room temperature. The wells were then washed three times and the  
7 color was developed by adding TMB Substrate and the reaction was stopped with STOP  
8 Solution. Optical density (OD) was measured at 450 nm using a Multiskan FC  
9 Microplate Photometer (Thermo Scientific, MA, USA).

## 10 **FeCl<sub>3</sub>-induced thrombosis formation in mouse mesenteric arteriole**

11 Intravital microscopy of FeCl<sub>3</sub>-injured thrombus formation in mouse mesenteric  
12 arteriole was performed as described previously with minor modification [3, 13].  
13 Briefly, after intravenous injection of 200  $\mu$ g/kg Spike protein or control (saline)  
14 according to the method reported with minor modification [14], calcein-labeled  
15 platelets were injected into C57BL/6 wild-type mice by the lateral tail vein. Thrombosis  
16 was induced by 10% FeCl<sub>3</sub> for 1 min in the mesenteric arterioles within 30 min after  
17 intravenous administration of vehicle control or Spike protein and recorded with  
18 intravital microscopy for 10 min as described previously [3].

## 19 **Thrombus formation under flow conditions *ex vitro***

20 Flow chamber assay was prepared as described previously with little modification [12].  
21 Briefly, Thrombus formation was evaluated in a microfluidic whole-blood perfusion

1 assay on a fibrillar collagen matrix under arterial shear conditions (a shear rate of 1000  
2  $s^{-1}$ ) using a Bioflux-200 system (Fluxion). Bioflux plates were coated with fibrillar  
3 collagen (100  $\mu g/mL$ ) overnight and blocked with 5% BSA. Wild-type and hACE2  
4 whole blood were incubated with mepacrine (100  $\mu M$ ) plus Spike protein (2  $\mu g/mL$ )  
5 for 30 min and perfused over fibrillar collagen-coated bioflux plates at shear force of  
6 40  $dynes/cm^2$  with a Bioflux-200 system (Fluxion, South San Francisco, CA). the  
7 platelets were allowed to adhere to collagen for 5 min, and thrombus formation were  
8 visualized in real time by a fluorescence microscope (Nikon-Ti-S, Tokyo, Japan).  
9 Images were acquired with a Nikon DS-Qi1-U3 CCD camera, and the platelet-covered  
10 area was measured using Bioflux software (Fluxion, San Francisco, CA, USA).

### 11 **Statistical analysis**

12 Given the inherent differences between patients, a series of propensity score analyses  
13 were performed for following variables: age, sex, history of smoking, hypertension,  
14 diabetes mellitus, hypercholesterolemia, stroke and COPD. When matched with healthy  
15 group, variables included age, sex and history of smoking; when matched with other  
16 groups, variables included age, sex, history of smoking, hypertension, diabetes mellitus,  
17 hypercholesterolemia, stroke and COPD. The propensity scores were estimated using a  
18 logit model. Matching was conducted using 1:1 or 1:2 nearest neighbor method with a  
19 caliper width of  $0.25*SDs$  of the logit propensity score, which yield 28 Severe and  
20 critically severe type COVID-19 patients matched with 56 healthy subjects, 37 Severe  
21 and critically severe type COVID-19 patients matched with 37 Non-COVID-19 patients,  
22 29 Severe and critically severe type COVID-19 patients matched with 58 Mild and

1 moderate type COVID-19 patients, 64 Mild and moderate type COVID-19 patients  
2 matched with 64 healthy subjects, 59 non-COVID-19 subjects matched with 115 mild  
3 and moderate subjects, All matching analyses were performed using R software  
4 (version 3.6.0).

5 Continuous variables are expressed as the mean  $\pm$  standard deviation of the mean (SD)  
6 or median (interquartile range was defined as the difference between twenty-fifth and  
7 seventy-fifth centiles) depending on data distribution, and compared using the unpaired  
8 Student's t-test or the Mann-Whitney U test, as appropriate. Categorical variables were  
9 expressed as number and percentage and compared using the Chi-square test or Fisher's  
10 exact test. Prior to statistical analysis, all data were tested for normality (Kolmogorov-  
11 Smirnov), and subjected to the Bartlett's test for homogeneity of group Variances.  
12 Group comparisons were made using One-way ANOVA, followed by Tukey's post hoc  
13 analysis or Kruskal-Wallis test with Bonferroni correction. Pearson's correlation  
14 analysis was used to investigate the relationships between two variables. A *P* value of  
15 less than 0.05 was considered statistically significant. Statistical analyses were  
16 performed using the SPSS (version 21.0) and GraphPad Prism (7.0).

17

## 18 **References**

- 19 1. Chen W, Lan Y, Yuan X, Deng X, Li Y, Cai X *et al*: Detectable 2019-nCoV viral RNA in  
20 blood is a strong indicator for the further clinical severity. *Emerg Microbes Infect* 2020,  
21 9(1):469-473.
- 22 2. Zhang S, Zhang S, Hu L, Zhai L, Xue R, Ye J *et al*: Nucleotide-binding oligomerization  
23 domain 2 receptor is expressed in platelets and enhances platelet activation and thrombosis.  
24 *Circulation* 2015, 131(13):1160-1170.

- 1 3. Hu L, Chang L, Zhang Y, Zhai L, Zhang S, Qi Z *et al*: Platelets Express Activated P2Y<sub>12</sub>  
2 Receptor in Patients With Diabetes Mellitus. *Circulation* 2017, 136(9):817-833.
- 3 4. Zang R, Gomez Castro MF, McCune BT, Zeng Q, Rothlauf PW, Sonnek NM *et al*:  
4 TMPRSS2 and TMPRSS4 promote SARS-CoV-2 infection of human small intestinal  
5 enterocytes. *Sci Immunol* 2020, 5(47).
- 6 5. Glowacka I, Bertram S, Herzog P, Pfefferle S, Steffen I, Muench MO *et al*: Differential  
7 downregulation of ACE2 by the spike proteins of severe acute respiratory syndrome  
8 coronavirus and human coronavirus NL63. *J Virol* 2010, 84(2):1198-1205.
- 9 6. Ho TY, Wu SL, Chen JC, Li CC, Hsiang CY: Emodin blocks the SARS coronavirus spike  
10 protein and angiotensin-converting enzyme 2 interaction. *Antiviral research* 2007,  
11 74(2):92-101.
- 12 7. Zhou P, Yang XL, Wang XG, Hu B, Zhang L, Zhang W *et al*: A pneumonia outbreak  
13 associated with a new coronavirus of probable bat origin. *Nature* 2020, 579(7798):270-273.
- 14 8. Sauter RJ, Sauter M, Reis ES, Emschermann FN, Nording H, Ebenhoch S *et al*: Functional  
15 Relevance of the Anaphylatoxin Receptor C3aR for Platelet Function and Arterial  
16 Thrombus Formation Marks an Intersection Point Between Innate Immunity and  
17 Thrombosis. *Circulation* 2018, 138(16):1720-1735.
- 18 9. Polasky C, Wallesch M, Loyal K, Pries R, Wollenberg B: Measurement of leukocyte-  
19 platelet aggregates (LPA) by FACS: a comparative analysis. *Platelets* 2020:1-6.
- 20 10. Koupenova M, Corkrey HA, Vitseva O, Manni G, Pang CJ, Clancy L *et al*: The role of  
21 platelets in mediating a response to human influenza infection. *Nature communications*  
22 2019, 10(1):1780.
- 23 11. Koupenova M, Vitseva O, MacKay CR, Beaulieu LM, Benjamin EJ, Mick E *et al*: Platelet-  
24 TLR7 mediates host survival and platelet count during viral infection in the absence of  
25 platelet-dependent thrombosis. *Blood* 2014, 124(5):791-802.
- 26 12. Liu Y, Hu M, Luo D, Yue M, Wang S, Chen X *et al*: Class III PI3K Positively Regulates  
27 Platelet Activation and Thrombosis via PI(3)P-Directed Function of NADPH Oxidase.  
28 *Arterioscler Thromb Vasc Biol* 2017, 37(11):2075-2086.
- 29 13. Hu L, Fan Z, Du H, Ni R, Zhang S, Yin K *et al*: BF061, a novel antiplatelet and  
30 antithrombotic agent targeting P2Y<sub>1</sub>(2) receptor and phosphodiesterase. *Thromb*

1        *Haemost* 2011, 106(6):1203-1214.

2    14. Kuba K, Imai Y, Rao S, Gao H, Guo F, Guan B *et al*: A crucial role of angiotensin converting  
3        enzyme 2 (ACE2) in SARS coronavirus-induced lung injury. *Nature medicine* 2005,  
4        11(8):875-879.

5

6

**Online Table 1. Antibodies, staining chemicals and dilutions used in this study**

| <b>Antibody</b>                    | <b>Dilutions<br/>for WB</b> | <b>Dilutions<br/>for IP</b> | <b>Dilutions<br/>for FCM</b> | <b>Dilutions<br/>for IF</b> | <b>Company</b>            | <b>Catalogue No.</b> |
|------------------------------------|-----------------------------|-----------------------------|------------------------------|-----------------------------|---------------------------|----------------------|
| Rabbit anti ACE2                   | 1:1000                      |                             | 1:100                        |                             | Cell Signaling Technology | 4355                 |
| Rabbit anti CD14                   | 1:1000                      |                             |                              |                             | Abcam                     | ab133335             |
| Mouse anti ACE2                    |                             | 1:50                        |                              |                             | R&D Systems               | MAB9331              |
| Rabbit anti-phospho-(Ser/Thr)      | 1:200                       |                             |                              |                             | Abcam                     | ab117253             |
| Rabbit anti ACE2                   |                             |                             |                              | 1:500                       | Sino Biological           | 10108-T60            |
| Rabbit anti TMPRSS2                | 1:1000                      |                             | 1:100                        |                             | Abcam                     | ab92323              |
| Rabbit anti TMPRSS2                |                             |                             |                              | 1:500                       | Invitrogen                | PA5-14264            |
| APC-Mouse anti CD41                |                             |                             | 1:100                        |                             | BD Bioscience             | 561422               |
| PE-Mouse anti CD62P                |                             |                             | 1:100                        |                             | BD Bioscience             | 551142               |
| FITC-Mouse anti PAC-1              |                             |                             | 1:100                        |                             | Thermo Fisher             | MA5-28564            |
| KrO-Mouse anti CD45                |                             |                             | 1:100                        |                             | Immunotech SAS            | B36294               |
| PE-Mouse anti CD41                 |                             |                             | 1:100                        |                             | Immunotech SAS            | A07781               |
| FITC-Mouse anti CD65               |                             |                             | 1:100                        |                             | Immunotech SAS            | IM1654U              |
| PC7-Mouse anti CD14                |                             |                             | 1:100                        |                             | Immunotech SAS            | A22331               |
| Rabbit anti p-Erk                  | 1:1000                      |                             |                              |                             | Cell Signaling Technology | 4370                 |
| Rabbit anti Erk                    | 1:1000                      |                             |                              |                             | Cell Signaling Technology | 4695                 |
| Rabbit anti p-p38                  | 1:1000                      |                             |                              |                             | Cell Signaling Technology | 4511                 |
| Rabbit anti p38                    | 1:1000                      |                             |                              |                             | Cell Signaling Technology | 8690                 |
| Rabbit anti p-JNK                  | 1:1000                      |                             |                              |                             | Cell Signaling Technology | 9251                 |
| Rabbit anti JNK                    | 1:1000                      |                             |                              |                             | Cell Signaling Technology | 9252                 |
| Mouse anti GAPDH                   | 1:20000                     |                             |                              |                             | Proteintech               | 60004                |
| Mouse anti SARS-CoV-2 Nucleocapsid |                             |                             |                              | 1:500                       | Sino Biological           | 40143-MM08           |
| Mouse anti CD41                    |                             |                             |                              | 1:500                       | Proteintech               | 24552-1-AP           |
| Rabbit anti CD41                   |                             |                             |                              | 1:500                       | Invitrogen                | MA1-19381            |

|                                        |         |       |                       |             |
|----------------------------------------|---------|-------|-----------------------|-------------|
| FITC Mouse IgG1, Isotype Ctrl Antibody | 1:100   |       | Biolegend             | 400109      |
| PE Mouse IgG, Isotype Ctrl Antibody    | 1:100   |       | Biolegend             | 400213      |
| APC Mouse IgG, Isotype Ctrl Antibody   | 1:100   |       | Biolegend             | 400119      |
| Alexa Fluor 488 Goat anti-Rabbit IgG   | 1:100   | 1:500 | Thermo Fisher         | A11034      |
| Alexa fluor 594 Goat anti-Rabbit IgG   |         | 1:500 | Jackson ImunoResearch | 615-585-214 |
| Alexa Fluor 488 Goat Anti-Mouse IgG    |         | 1:500 | Jackson ImunoResearch | 615-545-214 |
| Goat Anti-Rabbit IgG HRP               | 1:10000 |       | Abcam                 | ab205718    |
| Goat Anti-Mouse IgG HRP                | 1:10000 |       | Abcam                 | ab6789      |
| Annexin V-FITC                         | 1:100   |       | BD Bioscience         | 556419      |
| DAPI                                   | 1:100   |       | Beyotime              | C1002       |

Abbreviation: **WB**, western blotting; **IP**, Immunoprecipitation; **FCM**, Flow Cytometry; **IF**, immunofluorescence

1  
2

**Online Table 2. The primers used for RT-PCR**

| Gene    | Homo sapiens            |                |              | Mouse                   |                |              |
|---------|-------------------------|----------------|--------------|-------------------------|----------------|--------------|
|         | Primer 5' → 3'          | Accession No.  | Product (bp) | Primer 5' → 3'          | Accession No.  | Product (bp) |
| ACE2    | GTGGGATGGAGTACCGACTG    | NM_001371415.1 | 531          | GGCGACAAGCACAGACTACAA   | NM_001130513.1 | 117          |
|         | AGGATTTTCTCCACTTCTTGCTT |                |              | GCCATCTCGTTTTTCAGGACC   |                |              |
| TMPRSS2 | TGAAAGCGGGTGTGAGGAGC    | NM_001135099.1 | 359          | AAGTCCTCAGGAGCACTGTGCA  | NM_015775.2    | 116          |
|         | GGGTCAAGGTGATGCACAGT    |                |              | CAGAACCTCCAAAGCAAGACAGC |                |              |
| CD14    | TCCCGGCCATCCAGAATCTA    | NM_000591.4    | 197          | TTGAACCTCCGCAACGTGTCGT  | NM_009841.4    | 124          |
|         | AGCGAACGACAGATTGAGGG    |                |              | CGCAGGAAAAGTTGAGCGAGTG  |                |              |
| GAPDH   | GGAGCGAGATCCCTCCAAAAT   | NM_002046.7    | 197          | CATCACTGCCACCCAGAAGACTG | NM_001289726.1 | 153          |
|         | GGCTGTTGTCATACTTCTCATGG |                |              | ATGCCAGTGAGCTTCCCGTTCAG |                |              |



1 **Online Table 3. Characteristics of Healthy, Non-COVID-19 patients, Mild and moderate type COVID-19 patients and Severe and critically severe type**  
2 **COVID-19 patients groups before propensity score matching**

|                                        | Healthy<br>(n=166)   | Non-COVID-19<br>(n=60) | Mild and moderate type<br>COVID-19 (n=184) | Severe and critically severe type<br>COVID-19 (n=57) | <i>P</i> value |
|----------------------------------------|----------------------|------------------------|--------------------------------------------|------------------------------------------------------|----------------|
| Age, years                             | 49.57±14.39          | 46.05±14.45            | 44.80±14.88                                | 58.23±14.74                                          | <0.001         |
| Men                                    | 78(46.99%)           | 34(56.67%)             | 106 (57.61%)                               | 38 (66.67%)                                          | 0.046          |
| History of smoking                     | 31(18.67%)           | 25(41.67%)             | 63(34.24%)                                 | 23(40.35%)                                           | <0.001         |
| <b>Medical history</b>                 |                      |                        |                                            |                                                      |                |
| Hypertension                           | —                    | 18(30.00%)             | 26(14.13%)                                 | 15(26.32%)                                           | 0.010          |
| Diabetes mellitus                      | —                    | 17(28.33%)             | 33(17.93%)                                 | 18(31.58%)                                           | 0.049          |
| hypercholesterolemia                   | —                    | 11(18.33%)             | 24(13.04%)                                 | 16(28.07%)                                           | 0.029          |
| Stroke                                 | —                    | 8(13.33%)              | 8(4.35%)                                   | 7(12.28%)                                            | 0.026          |
| COPD                                   | —                    | 3(5.00%)               | 4(2.17%)                                   | 2(3.51%)                                             | 0.520          |
| <b>Platelet parameters</b>             |                      |                        |                                            |                                                      |                |
| Platelet count, ×10 <sup>9</sup> per L | 229.30±54.43         | 229.80±60.23           | 194.20±66.44                               | 108.90±70.55                                         | <0.001* † ‡    |
| MPV, fL                                | 8.80(8.10-9.50)      | 8.90(8.40-10.02)       | 9.60(8.90-10.38)                           | 10.70(9.90-12.30)                                    | <0.001* † ‡    |
| PCT, %                                 | 0.21(0.19-0.25)      | 0.22(0.17-0.25)        | 0.20(0.15-0.24)                            | 0.14(0.08-0.21)                                      | <0.001* † ‡    |
| PDW, fL                                | 16.10(15.90-16.40)   | 16.15(15.90-16.44)     | 16.26(16.00-16.41)                         | 16.70(16.30-17.35)                                   | 0.003* † ‡     |
| <b>Coagulation function</b>            |                      |                        |                                            |                                                      |                |
| PT, s                                  | 10.20(9.80-11.80)    | 10.65(9.70-11.60)      | 10.40(9.90-11.90)                          | 12.50(10.45-15.60)                                   | <0.001* † ‡    |
| PTA, %                                 | 106.47(89.32-111.63) | 101.13(91.21-112.99)   | 104.04(88.40-110.30)                       | 83.20(62.69-104.03)                                  | <0.001* † ‡    |
| INR                                    | 0.99(0.96-1.11)      | 1.03(0.95-1.10)        | 1.01(0.97-1.12)                            | 1.16(1.01-1.40)                                      | <0.001* † ‡    |
| APTT, s                                | 29.71±2.40           | 29.86±4.98             | 28.75±4.89                                 | 34.76±16.63                                          | 0.017* † ‡     |
| Fibrinogen, g/L                        | 3.73(2.45-4.07)      | 3.87(2.60-4.48)        | 3.46(2.51-4.38)                            | 3.75(2.25-5.25)                                      | 0.312          |
| TT, s                                  | 14.90(14.60-15.60)   | 15.70(14.80-16.60)     | 16.60(13.90-17.70)                         | 17.10(16.30-19.00)                                   | 0.005* † ‡     |
| D-dimer, mg/L (FEU)                    | 0.58(0.46-0.77)      | 0.61(0.22-0.73)        | 0.62(0.20-0.74)                            | 1.84(0.91-5.53)                                      | 0.011* † ‡     |
| FDPs, ug/ml                            | 2.74(1.62-3.91)      | 2.61(0.92-4.73)        | 2.59(1.66-4.10)                            | 11.41(4.56-22.91)                                    | <0.001* † ‡    |

3 Values are mean ± SD, %, or median (interquartile range). \*Significant difference (*P* < 0.05) between “Severe and critically severe type COVID-19” and  
4 “Healthy”; † Significant difference (*P* < 0.05) between “Severe and critically severe type COVID-19” and “Non-COVID-19”; ‡ Significant difference (*P* <  
5 0.05) between “Severe and critically severe type COVID-19” and “Mild and moderate type COVID-19”.

6 COPD: Chronic obstructive pulmonary disease, MPV: Mean platelet volume, PCT: plateletcrit, PDW: platelet distribution width, PT: Prothrombin time, PTA:  
7 Prothrombin time activity, INR: International Normalized Ratio, APTT: Activated partial thromboplastin time, TT: Thrombin time, FDPs: Fibrinogen Degradation  
8 Products

1 **Online Table 4. Patient Characteristics after propensity score matching Severe and critically severe type COVID-19 patients group to healthy group**  
 2 **(1:2), Non-COVID-19 patients group (1:1) or Mild and moderate type COVID-19 patients group (1:2)**

|                                              | Severe and critically severe type COVID-19 (n=28) | healthy (n=56)       | <i>P</i> value | Severe and critically severe type COVID-19 (n=37) | Non-COVID-19 (n=37)  | <i>P</i> value | Severe and critically severe type COVID-19 (n=29) | Mild and moderate type COVID-19 (n=58) | <i>P</i> value |
|----------------------------------------------|---------------------------------------------------|----------------------|----------------|---------------------------------------------------|----------------------|----------------|---------------------------------------------------|----------------------------------------|----------------|
| <b>Age, years</b>                            | 56.17±19.34                                       | 51.29±14.47          | 0.879          | 49.16±14.37                                       | 51.86±14.02          | 0.416          | 56.33±14.9                                        | 50.7±16.3                              | 0.087          |
| <b>Men</b>                                   | 19(67.86%)                                        | 36(64.29%)           | 0.746          | 24(64.86%)                                        | 20(54.05%)           | 0.344          | 17(58.62%)                                        | 27(46.55%)                             | 0.289          |
| <b>History of smoking</b>                    | 17(60.71%)                                        | 36(64.29%)           | 0.750          | 15(40.54%)                                        | 13(35.14%)           | 0.632          | 9(31.03%)                                         | 11(18.97%)                             | 0.207          |
| <b>Medical history</b>                       |                                                   |                      |                |                                                   |                      |                |                                                   |                                        |                |
| <b>Hypertension</b>                          | 2(7.14%)                                          | —                    | —              | 6(16.22%)                                         | 7(18.92%)            | 0.760          | 6(20.69%)                                         | 7(12.07%)                              | 0.288          |
| <b>Diabetes mellitus</b>                     | 0(0%)                                             | —                    | —              | 2(5.41%)                                          | 10(27.03%)           | 0.611          | 7(24.14%)                                         | 12(20.69%)                             | 0.269          |
| <b>hypercholesterolemia</b>                  | 1(3.57%)                                          | —                    | —              | 8(21.62%)                                         | 9(24.32%)            | 0.782          | 7(24.14%)                                         | 10(17.24%)                             | 0.444          |
| <b>Stroke</b>                                | 0(0%)                                             | —                    | —              | 1(2.70%)                                          | 2(5.41%)             | 1.000          | 0(0%)                                             | 0(0%)                                  | —              |
| <b>COPD</b>                                  | 0(0%)                                             | —                    | —              | 0(0%)                                             | 0(0%)                | —              | 0(0%)                                             | 0(0%)                                  | —              |
| <b>Platelet parameters</b>                   |                                                   |                      |                |                                                   |                      |                |                                                   |                                        |                |
| <b>Platelet count, ×10<sup>9</sup> per L</b> | 107.37±55.84                                      | 207.59±48.12         | 0.012          | 98.96±43.17                                       | 211.5±65.28          | <0.001         | 91.59±62.94                                       | 189.36±61.73                           | <0.001         |
| <b>MPV, fL</b>                               | 11.45(10.35-12.7)                                 | 8.45(7.80-9.20)      | <0.001         | 10.50(10.00-12.11)                                | 9.00(8.30-10.03)     | <0.001         | 10.70(10.10-12.40)                                | 9.60(9.10-10.30)                       | <0.001         |
| <b>PCT, %</b>                                | 0.16(0.09-0.25)                                   | 0.20(0.18-0.22)      | 0.049          | 0.15(0.10-0.21)                                   | 0.22(0.17-0.25)      | 0.002          | 0.14(0.09-0.19)                                   | 0.19(0.15-0.23)                        | 0.004          |
| <b>PDW, fL</b>                               | 16.75(16.20-17.50)                                | 16.10(15.90-16.30)   | <0.001         | 16.50(16.10-17.10)                                | 16.20(15.90-16.50)   | 0.003          | 16.60(16.20-17.02)                                | 16.30(16.09-16.41)                     | 0.001          |
| <b>Coagulation function</b>                  |                                                   |                      |                |                                                   |                      |                |                                                   |                                        |                |
| <b>PT, s</b>                                 | 12.20(10.45-16.50)                                | 10.50(9.65-11.60)    | 0.034          | 11.80(10.40-15.10)                                | 10.30(9.30-11.40)    | <0.001         | 11.50(10.40-15.20)                                | 10.50(10.10-11.80)                     | 0.001          |
| <b>PTA, %</b>                                | 85.74(58.18-103.45)                               | 102.86(91.21-113.68) | 0.029          | 89.32(65.43-104.04)                               | 105.24(93.16-118.71) | <0.001         | 92.17(64.87-104.04)                               | 102.86(89.32-107.72)                   | <0.001         |
| <b>INR</b>                                   | 1.14(1.01-1.46)                                   | 1.01(0.95-1.10)      | 0.017          | 1.11(1.01-1.36)                                   | 1.00(0.92-1.08)      | 0.018          | 1.09(1.01-1.37)                                   | 1.01(0.98-1.11)                        | 0.021          |
| <b>APTT, s</b>                               | 33.75±12.55                                       | 29.40±2.79           | 0.013          | 33.47±11.63                                       | 28.90±4.44           | 0.033          | 34.01±13.63                                       | 28.60±3.74                             | 0.038          |
| <b>Fibrinogen, g/L</b>                       | 3.59(2.18-4.83)                                   | 3.72(2.59-3.94)      | 0.218          | 3.67(2.33-5.12)                                   | 3.75(2.45-4.42)      | 0.888          | 3.67(2.25-5.06)                                   | 3.84(2.70-4.53)                        | 0.658          |
| <b>TT, s</b>                                 | 17.05(16.30-18.90)                                | 14.75(14.35-15.3)    | <0.001         | 16.90(16.30-18.50)                                | 15.80(14.80-16.80)   | 0.025          | 17.00(16.30-19.10)                                | 16.90(13.60-18.30)                     | 0.036          |
| <b>D-dimer, mg/L (FEU)</b>                   | 1.77(0.75-4.06)                                   | 0.42(0.34-0.57)      | <0.001         | 1.84(0.89-6.28)                                   | 0.56(0.30-0.69)      | <0.001         | 1.84(0.92-5.34)                                   | 0.50(0.19-0.73)                        | <0.001         |
| <b>FDPs, ug/ml</b>                           | 9.94(5.55-20.96)                                  | 2.71(1.69-4.10)      | <0.001         | 15.35(6.42-23.32)                                 | 2.50(0.73-3.86)      | <0.001         | 11.90(5.18-22.49)                                 | 2.54(1.83-3.86)                        | <0.001         |

3 Values are mean ± SD, %, or median (interquartile range).

4 COPD: Chronic obstructive pulmonary disease, MPV: Mean platelet volume, PCT: plateletcrit, PDW: platelet distribution width, PT: Prothrombin time, PTA:  
 5 Prothrombin time activity, INR: International Normalized Ratio, APTT: Activated partial thromboplastin time, TT: Thrombin time, FDPs: Fibrinogen Degradation  
 6 Products

1 **Online Table 5. Patient Characteristics after propensity score matching healthy group to Mild and moderate type COVID-19 group (1:1) or Non-COVID-**  
2 **19 patients group to Mild and moderate type COVID-19 group (1:2)**

|                                        | healthy<br>(n=64)    | Mild and moderate type<br>COVID-19 (n=64) | <i>P</i> value | Non-COVID-19<br>(n=59) | Mild and moderate type<br>COVID-19 (n=115) | <i>P</i> value |
|----------------------------------------|----------------------|-------------------------------------------|----------------|------------------------|--------------------------------------------|----------------|
| Age, years                             | 47.16±14.87          | 44.30±11.84                               | 0.231          | 46.05±14.57            | 45.68±14.94                                | 0.875          |
| Men                                    | 31(48.43%)           | 33(51.56%)                                | 0.724          | 34(57.63%)             | 70(60.87%)                                 | 0.680          |
| History of smoking                     | 19(29.69%)           | 15(23.44%)                                | 0.423          | 24(40.68%)             | 46(40%)                                    | 0.931          |
| <b>Medical history</b>                 |                      |                                           |                |                        |                                            |                |
| Hypertension                           | —                    | 1(1.56%)                                  | —              | 10(16.95%)             | 18(15.65%)                                 | 0.826          |
| Diabetes mellitus                      | —                    | 1(1.56%)                                  | —              | 17(28.81%)             | 34(29.57%)                                 | 0.918          |
| hypercholesterolemia                   | —                    | 0(0%)                                     | —              | 10(16.95%)             | 15(13.04%)                                 | 0.487          |
| Stroke                                 | —                    | 0(0%)                                     | —              | 4(6.78%)               | 6(5.22%)                                   | 0.736          |
| COPD                                   | —                    | 0(0%)                                     | —              | 3(5.08%)               | 3(2.61%)                                   | 0.409          |
| <b>Platelet parameters</b>             |                      |                                           |                |                        |                                            |                |
| Platelet count, ×10 <sup>9</sup> per L | 211.85±47.29         | 183.66±73.16                              | 0.038          | 206.50±48.24           | 195.43±69.94                               | 0.047          |
| MPV, fL                                | 8.75(7.95-9.55)      | 9.75(8.90-10.55)                          | <0.001         | 8.90(8.40-10.00)       | 9.60(9.00-10.50)                           | <0.001         |
| PCT, %                                 | 0.21(0.19-0.24)      | 0.20(0.15-0.24)                           | 0.143          | 0.22(0.18-0.25)        | 0.20(0.14-0.24)                            | 0.016          |
| PDW, fL                                | 16.10(15.90-16.30)   | 16.20(16.01-16.40)                        | 0.057          | 16.20(15.90-16.45)     | 16.30(16.01-16.41)                         | 0.146          |
| <b>Coagulation function</b>            |                      |                                           |                |                        |                                            |                |
| PT, s                                  | 10.35(9.70-11.80)    | 10.40(9.90-11.25)                         | 0.237          | 10.60(9.70-11.60)      | 11.05(10.40-13.10)                         | 0.191          |
| PTA, %                                 | 104.64(89.32-112.99) | 104.04(94.66-110.30)                      | 0.381          | 101.70(91.21-112.99)   | 96.74(78.47-104.04)                        | 0.379          |
| INR                                    | 1.00(0.95-1.11)      | 1.01(0.97-1.07)                           | 0.206          | 1.02(0.95-1.10)        | 1.06(1.01-1.21)                            | 0.591          |
| APTT, s                                | 28.45±2.43           | 29.05±3.75                                | 0.156          | 28.90±3.76             | 28.20±3.43                                 | 0.243          |
| Fibrinogen, g/L                        | 3.35(2.20-3.49)      | 3.61(2.48-4.38)                           | 0.134          | 3.92(2.68-4.48)        | 3.42(2.52-4.26)                            | 0.072          |
| TT, s                                  | 14.90(14.50-15.60)   | 15.95(13.80-17.60)                        | 0.128          | 15.70(14.80-16.40)     | 16.20(13.70-17.70)                         | 0.513          |
| D-dimer, mg/L (FEU)                    | 0.47(0.34-0.63)      | 0.52(0.22-0.66)                           | 0.201          | 0.53(0.19-0.74)        | 0.51(0.20-0.63)                            | 0.237          |
| FDPs, ug/ml                            | 2.54(1.50-3.71)      | 2.67(1.69-4.29)                           | 0.218          | 2.61(0.90-4.69)        | 3.02(1.47-4.27)                            | 0.180          |

3 Values are mean ± SD, %, or median (interquartile range).

4 COPD: Chronic obstructive pulmonary disease, MPV: Mean platelet volume, PCT: plateletcrit, PDW: platelet distribution width, PT: Prothrombin time, PTA:  
5 Prothrombin time activity, INR: International Normalized Ratio, APTT: Activated partial thromboplastin time, TT: Thrombin time, FDPs: Fibrinogen Degradation  
6 Products

online Figure 1

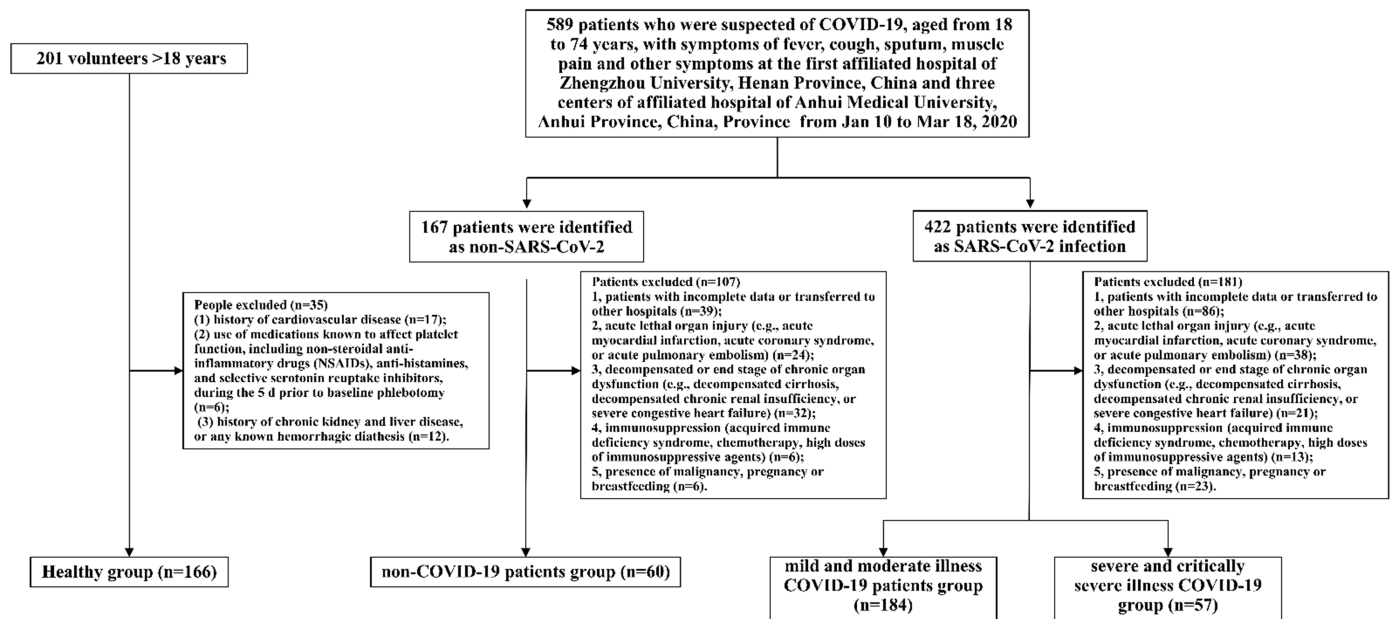

1 **Online Figure 1. The flowchart showing the strategy of groups enrollment.**

2

online Figure 2

**A**

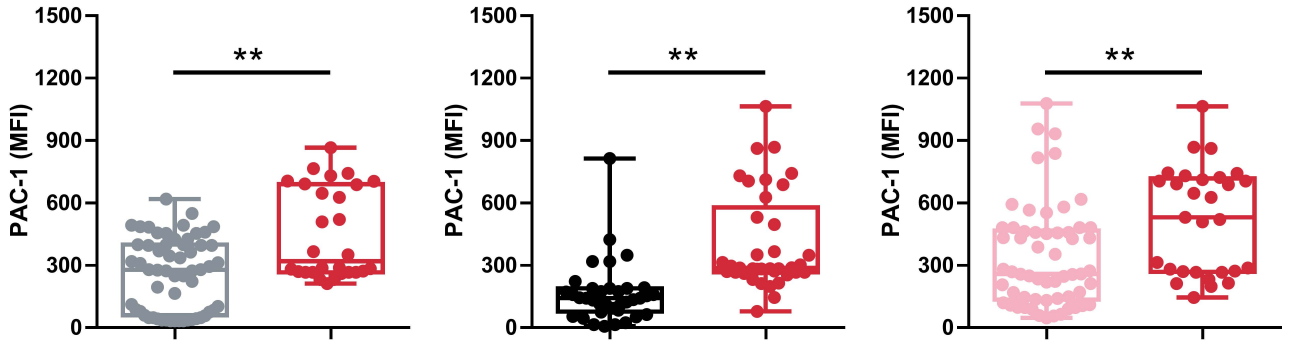

**B**

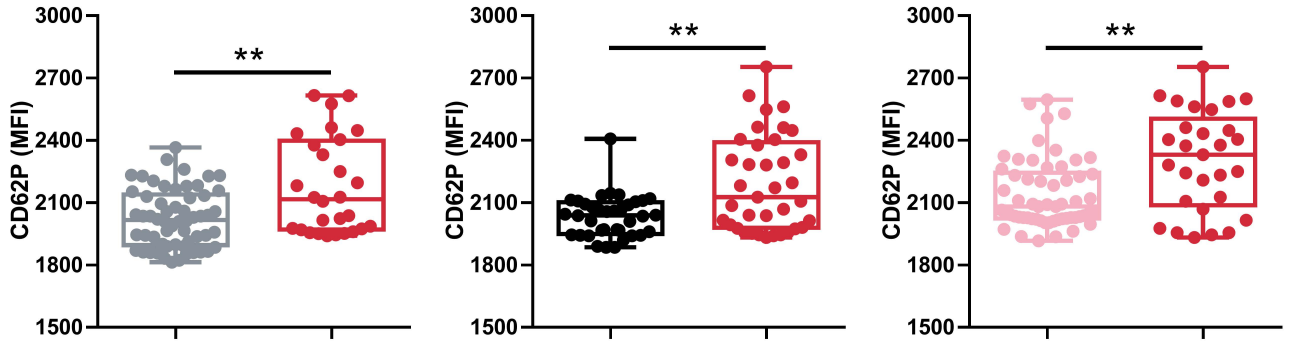

**C**

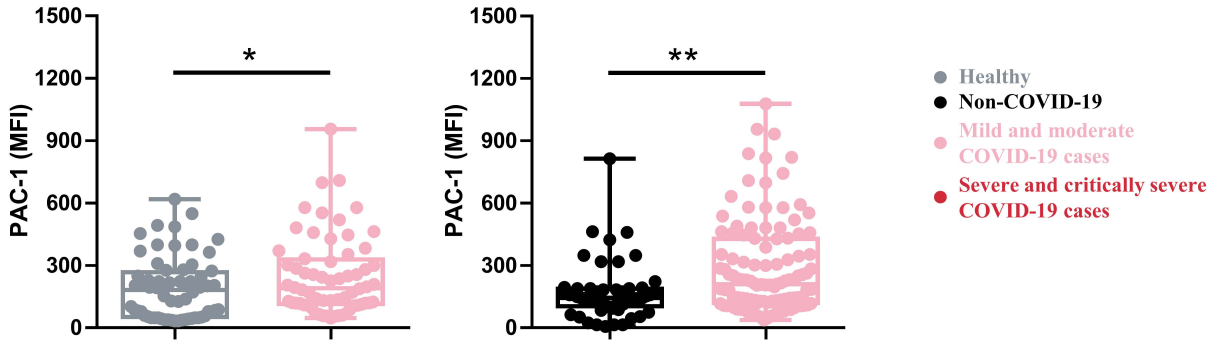

**D**

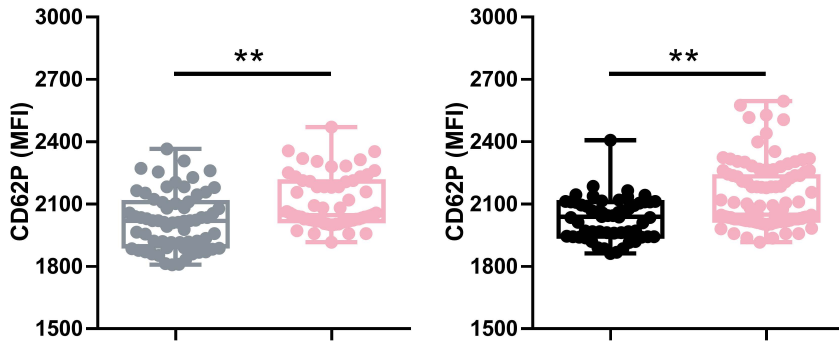

1 **Online Figure 2. Analysis of platelet activation in COVID-19 patients after**  
2 **propensity score matching. A and B, Dot plot showing increased platelet  $\alpha$ IIb $\beta$ 3**  
3 **activation (A) and CD62P expression (B) in severe and critically severe COVID-19**  
4 **patients compared with healthy donors (1:2 matching), non-COVID-19 patients (1:1**  
5 **matching) or mild and moderate COVID-19 patients (1:2 matching). C and D, Dot plot**  
6 **showing increased PAC-1 binding (C) and CD62P expression (D) in mild and moderate**  
7 **COVID-19 patients compared with healthy donors (1:1 matching), non-COVID-19**  
8 **patients (2:1 matching). \*\* $P < 0.01$  vs control. Statistical analyses were performed**  
9 **using Mann-Whitney U test. \* $P < 0.05$ ; \*\* $P < 0.01$ .**

10

online Figure 3

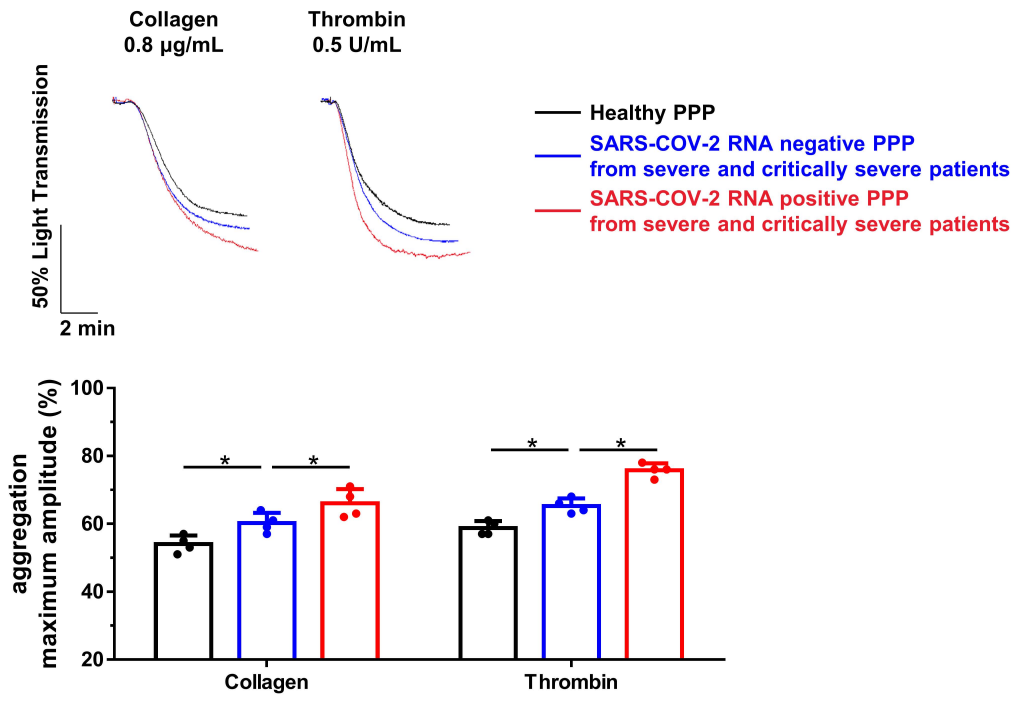



1 **Online Figure 3. SARS-CoV-2 RNA positive platelet-poor plasma enhanced**  
2 **platelet aggregation compared with SARS-CoV-2 RNA negative platelet-poor**  
3 **plasma and healthy platelet-poor plasma.** Healthy platelets were incubated with  
4 healthy platelet-poor plasma (PPP), SARS-COV-2 RNA positive PPP and SARS-COV-  
5 2 RNA negative PPP from severe and critically severe COVID-19 patients at the  
6 concentration of  $2 \times 10^8$  platelets/mL for 30 min, and subjected to platelet aggregation  
7 experiment. Statistical analyses were performed using one-way ANOVA followed by  
8 Tukey's post hoc analysis. \* $P < 0.05$ , n = 4.

SARS-CoV-2 ( $1 \times 10^5$  PFU)

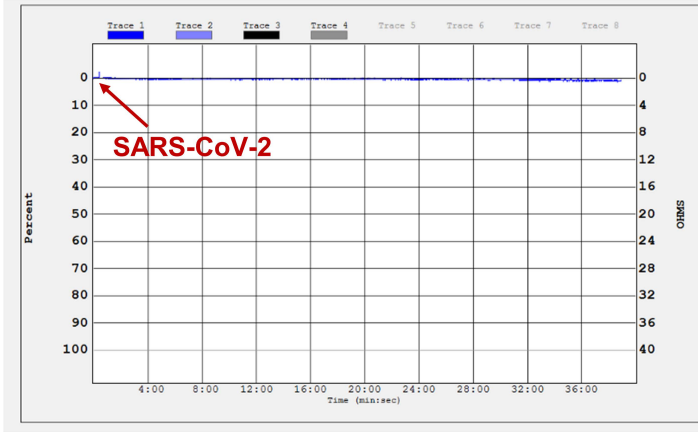

Spike (2  $\mu$ g/mL)

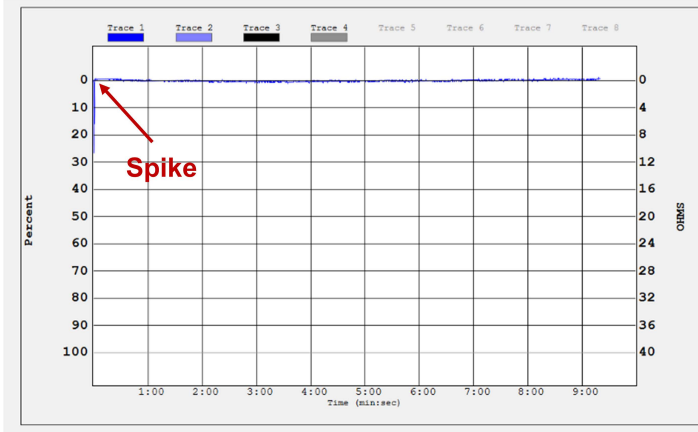

1 **Online Figure 4. SARS-CoV-2 and its Spike protein did not induce platelet**  
2 **aggregation in the absence of agonist.** Platelets were treated with SARS-CoV-2  
3 (( $1 \times 10^5$  PFU) or Spike protein (2  $\mu\text{g}/\text{mL}$ ) and platelet aggregation were monitored in  
4 indicated time in aggregometry.

5

A

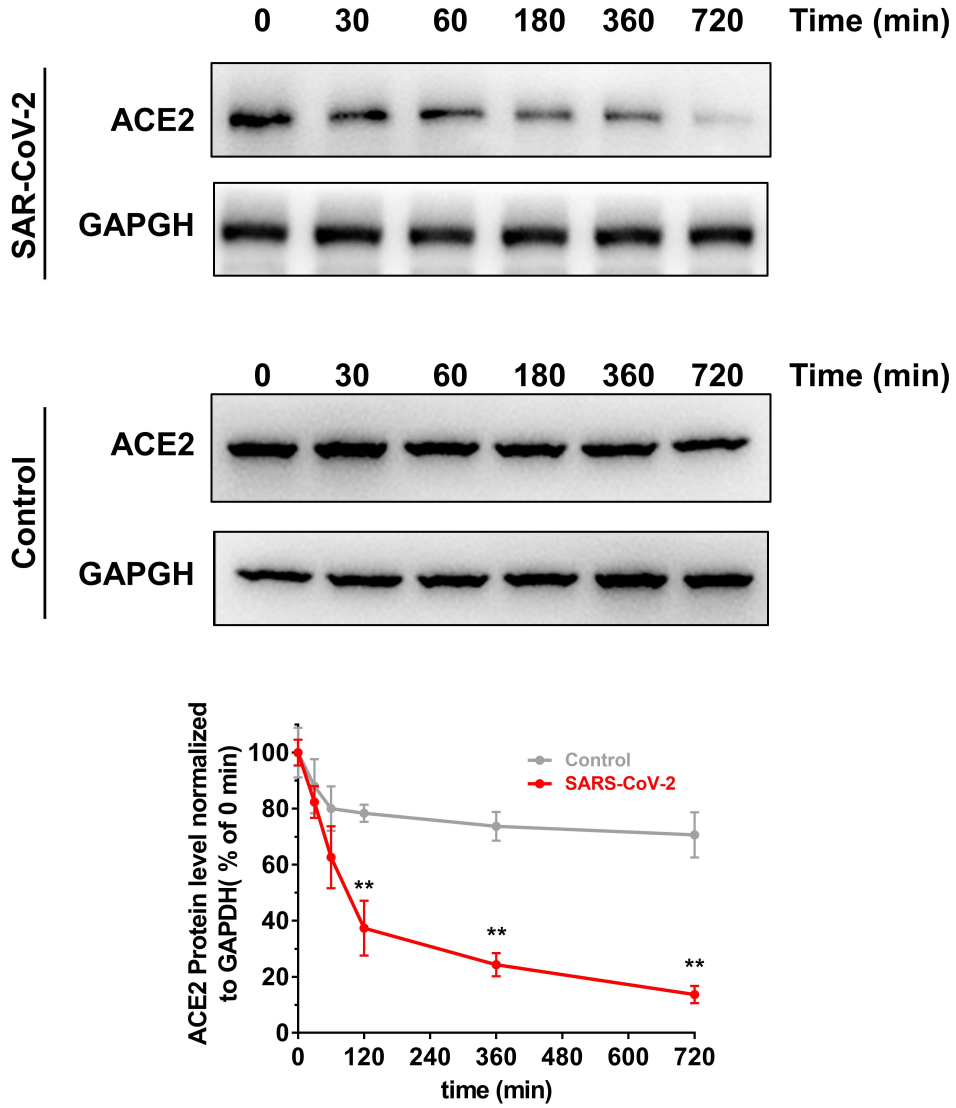

B

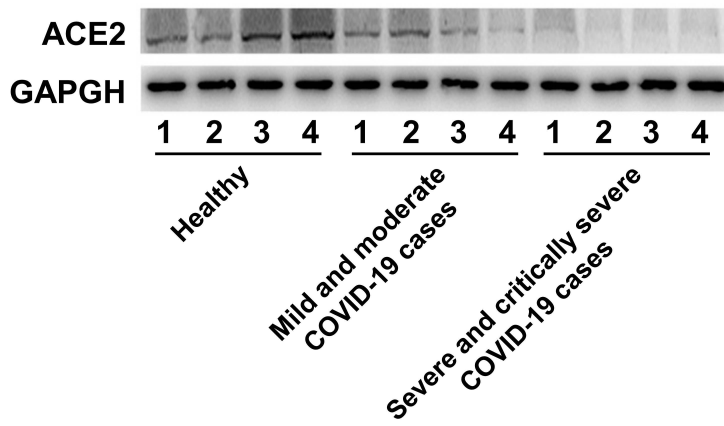

1 **Online Figure 5. Platelet ACE2 is reduced upon SARS-CoV-2 treatment. A,**  
2 Platelets from healthy donors were pretreated with SARS-CoV-2 ( $1 \times 10^5$  PFU) for  
3 various times, as indicated. The ACE2 protein level was detected by Western blot.  
4 Representative images and summary data of 3 experiments are presented using platelets  
5 from different healthy donors. Statistical analyses were performed using two-way  
6 ANOVA and Tukey's post hoc test. **\*\* $P < 0.01$  vs control.** **B, Decreased ACE2**  
7 **expression in platelets from COVID-19 patients. Representative images of 12 different**  
8 **individuals from healthy group (n = 4), mild and moderate COVID-19 group (n = 4)**  
9 **and severe and critically severe COVID-19 group (n = 4) are presented.**

10

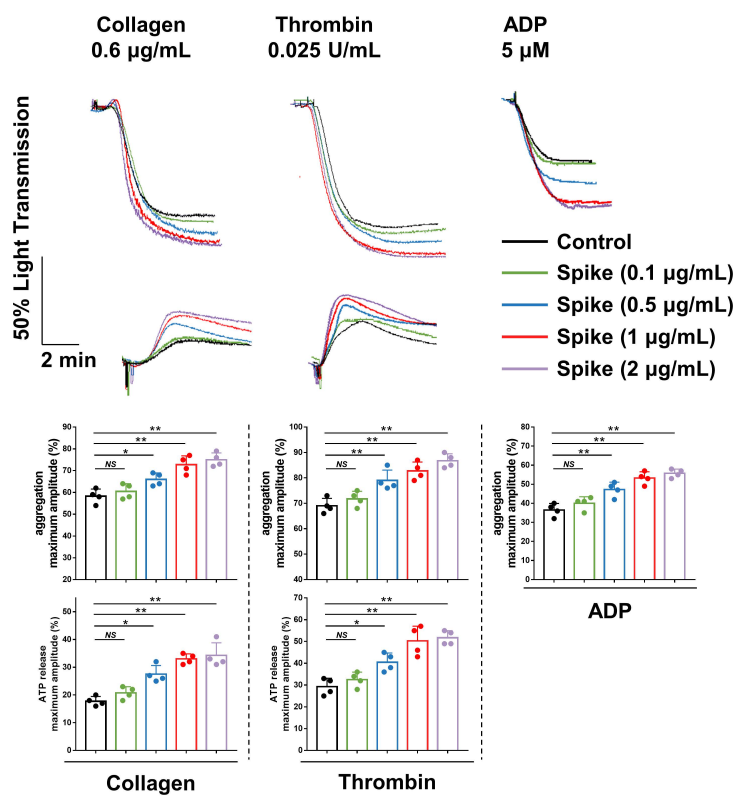

1 **Online Figure 6. SARS-CoV-2 Spike protein dose-dependently enhance platelet**  
2 **activation.** Washed platelets from healthy donors were incubated with Spike protein in  
3 the indicated concentration for 5 min, then stimulated with collagen (0.6  $\mu\text{g/mL}$ ),  
4 thrombin (0.025 U/mL), or ADP (5  $\mu\text{M}$ ). Aggregation and ATP release (with luciferase)  
5 were assessed under stirring at 1200 rpm. Representative results and summary data of  
6 4 experiments are presented. Statistical analyses were performed using One-way  
7 ANOVA, followed by Tukey's post hoc analysis. NS, no significance; \*P < 0.05; \*\*P <  
8 0.01.  
9

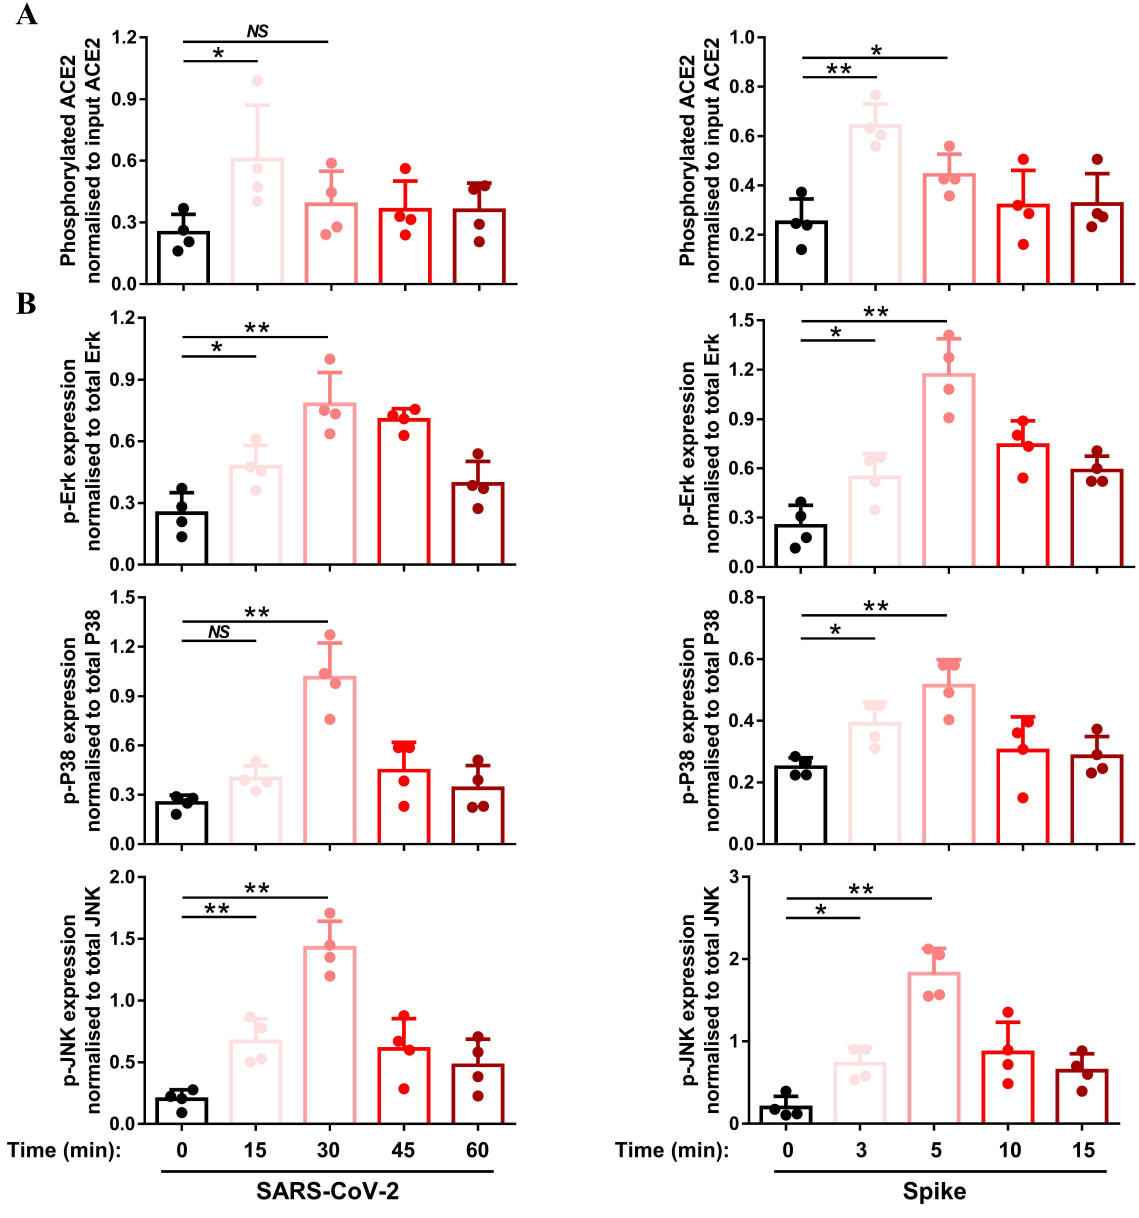



1 **Online Figure 7. SARS-CoV-2 and its Spike protein phosphorylates ACE2, Erk,**  
2 **p38, and JNK in human platelets.** **A**, Platelets were challenged with SARS-CoV-2 ( $1$   
3  $\times 10^5$  PFU) or Spike protein ( $2 \mu\text{g/mL}$ ), and quantitative analyses of phosphorylated  
4 ACE2 normalized to input ACE2, corresponding to **Figure 5A**, are provided from 4  
5 experiments using platelets from different donors. **B**, Platelets were challenged with  
6 SARS-CoV-2 ( $1 \times 10^5$  PFU) or Spike protein ( $2 \mu\text{g/mL}$ ), and quantitative analyses of  
7 p-Erk normalized to Erk, p-p38 normalized to p38, and p-JNK normalized to JNK, ,  
8 corresponding to **Figure 5A**, are provided from 4 experiments using platelets from  
9 different donors. Statistical analyses were performed using One-way ANOVA, followed  
10 by Tukey's post hoc analysis in **(A)** and **(B)**. *NS*, no significance;  $*P < 0.05$ ;  $**P < 0.01$ .

11

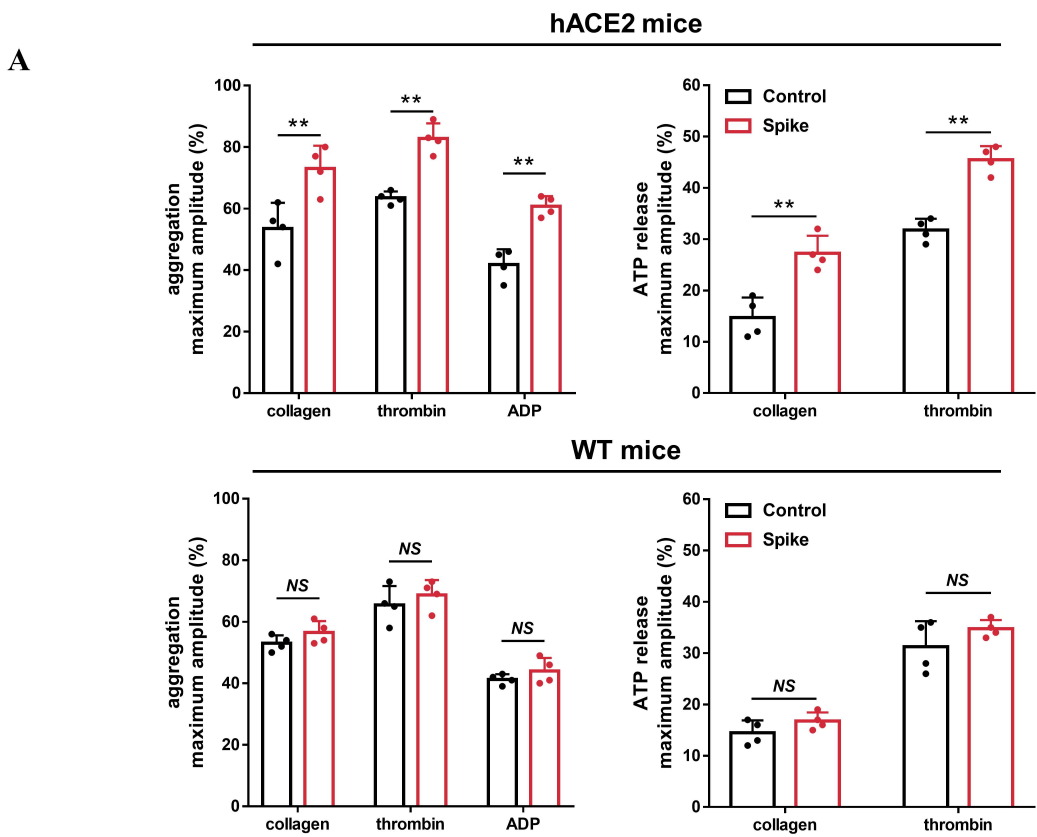

**B**

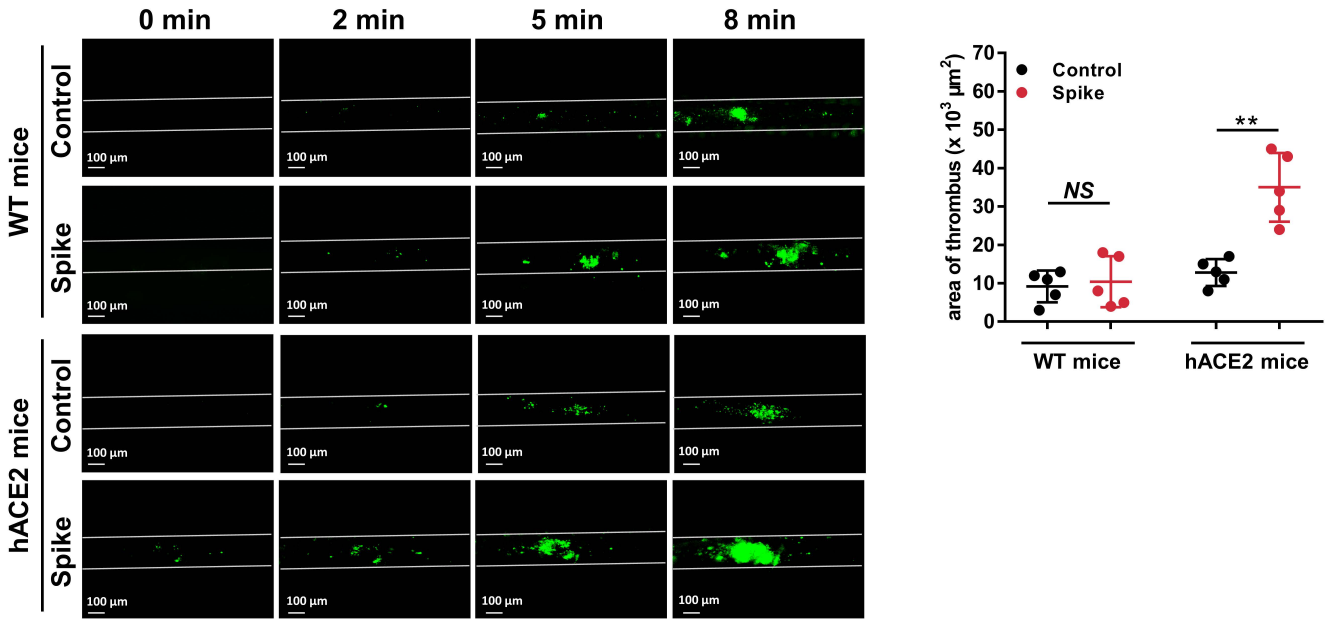

1 **Online Figure 8. Spike protein enhances *in vitro* platelet activation and *in vivo***  
2 **thrombosis potential in hACE2 transgenic mice. A,** Quantitative analysis of  
3 platelets aggregation and ATP release corresponding to **Figure 6C.** Data are provided  
4 from 4 experiments using platelets from different mice. **B,** After intravenous injection  
5 200 µg/kg Spike protein or control (saline), FeCl<sub>3</sub>-induced arterial thrombus  
6 formation was initiated, and the thrombus area was recorded. Representative image of  
7 thrombus formation and the relative fluorescence at different time points are shown.  
8 Statistically analysis of FeCl<sub>3</sub>-induced thrombosis by assessing thrombus area at 8  
9 min (n = 5). Statistical analyses were performed using unpaired two-tailed Student's t  
10 test. NS, no significance; \*\**P* < 0.01. WT indicates wild-type; hACE2 indicates  
hACE2 transgenic.

**A**

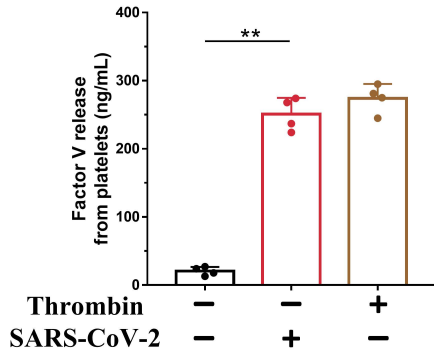

**B**

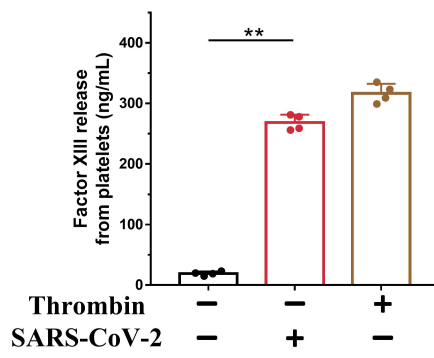

**C**

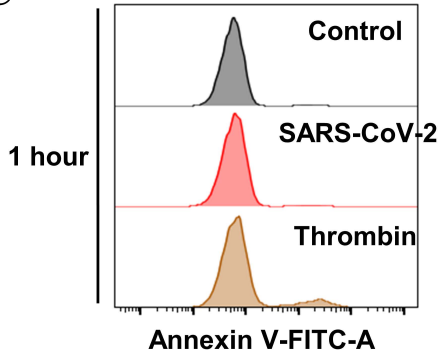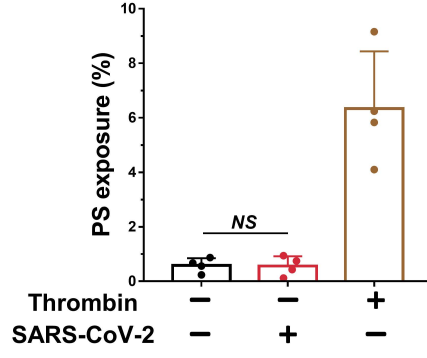

**D**

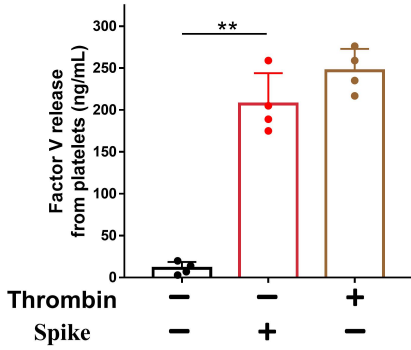

**E**

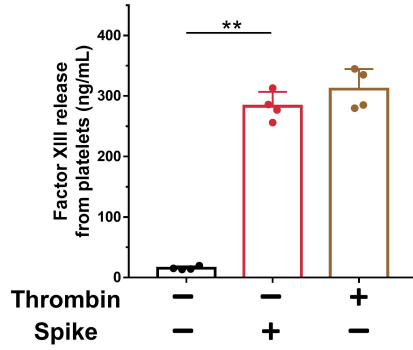

**F**

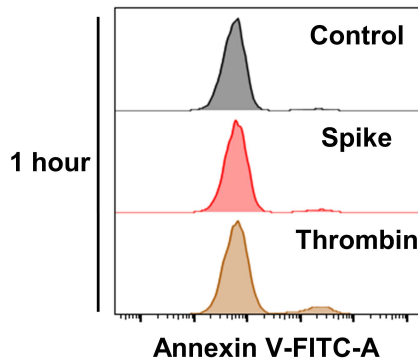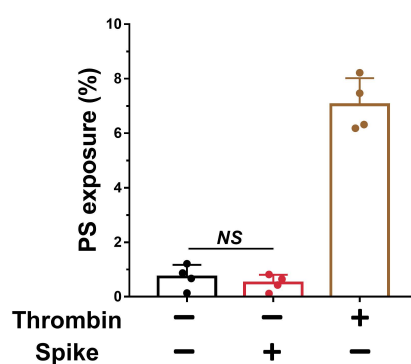

1 **Online Figure 9. SARS-CoV-2 directly stimulates platelets for coagulation factor**  
2 **release. A and B, SARS-CoV-2 induced release of Factor V (A) and Factor XIII (B)**  
3 **from platelets. Washed platelets from healthy donors were incubated with or without**  
4 **SARS-CoV-2 ( $1 \times 10^5$  PFU) for 1 h at room temperature, and subject to ELISA assays.**  
5 **Thrombin at 0.025 U/mL served as the positive control. Summary data of 4 experiments**  
6 **using platelets from different healthy donors are presented. C, SARS-CoV-2 had no**  
7 **effect on platelet phosphatidylserine (PS) exposure. Washed platelets from healthy**  
8 **donors were incubated with or without SARS-CoV-2 ( $1 \times 10^5$  PFU) for 1 h at room**  
9 **temperature, and then stained with Annexin V-FITC for 30 min. PS exposure was**  
10 **analyzed using flow cytometry. Thrombin at 0.05 U/mL served as the positive control.**  
11 **Representative images and summary data are presented from 4 experiments using**  
12 **platelets from different healthy donors. D and E, Spike protein (2  $\mu$ g/mL, 1 h) induced**  
13 **release of Factor V (D) and XIII (E) from platelets. Factor V and XIII in supernatant**  
14 **were assessed using commercial ELISA kits. Thrombin at 0.025 U/mL served as the**  
15 **positive control. Summary data of 4 experiments using platelets from different healthy**  
16 **donors are presented. F, Spike protein (2  $\mu$ g/mL) had no effect on platelet PS exposure**  
17 **after 1 h incubation. Thrombin at 0.05 U/mL served as the positive control.**  
18 **Representative images and summary data are presented from 4 experiments using**  
19 **platelets from different healthy donors. Statistical analyses were performed using One-**  
20 **way ANOVA, followed by Tukey's post hoc analysis in (A), (B), (C), (D), (E) and (F).**  
21 **NS, no significance; \*\* $P < 0.01$ .**

22

**A**

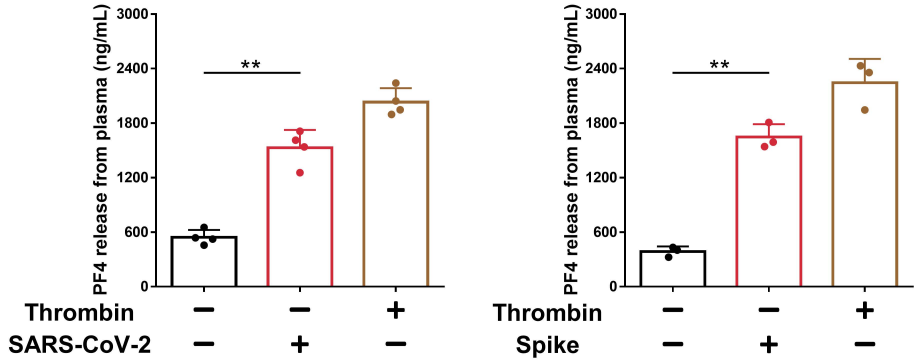

**B**

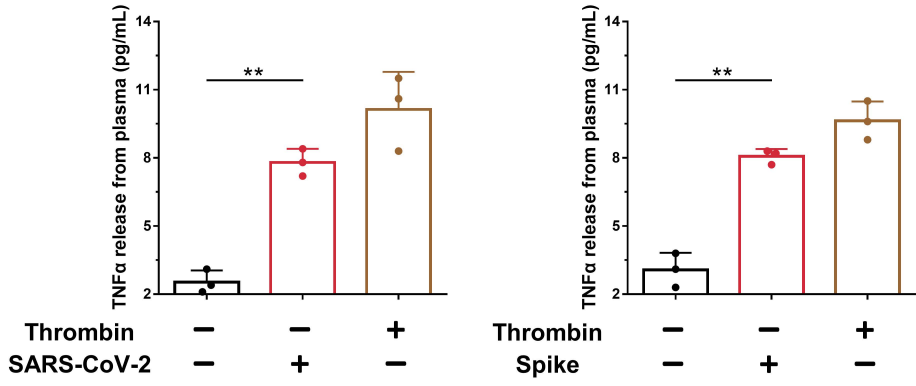

**C**

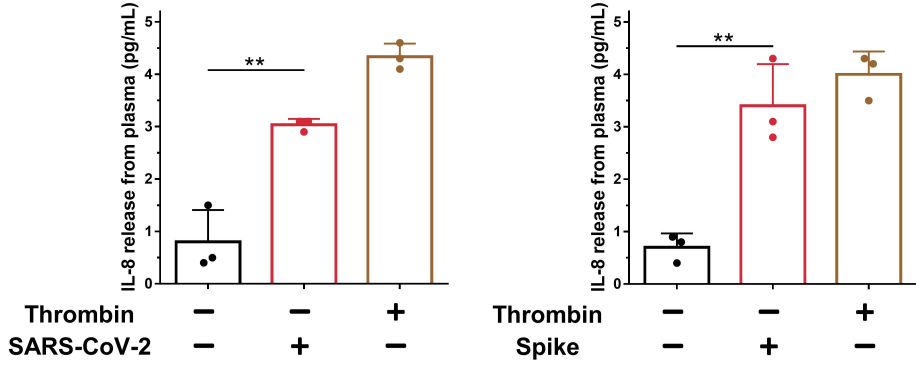

**D**

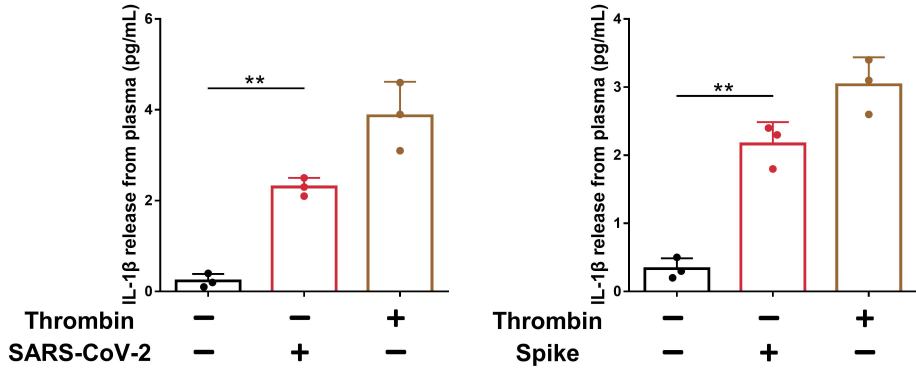

**E**

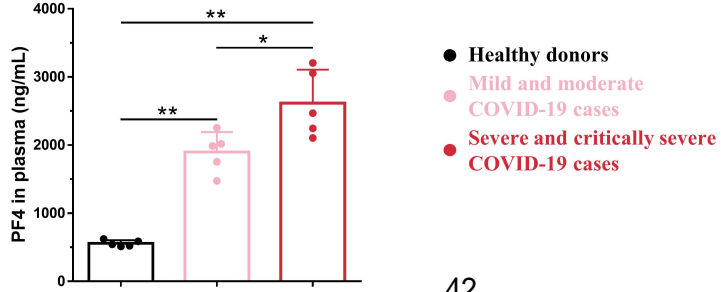

- Healthy donors
- Mild and moderate COVID-19 cases
- Severe and critically severe COVID-19 cases

1 **Online Figure 10. SARS-CoV-2 directly potentiates PF4 and inflammatory**  
2 **cytokines secretion from platelets. A,** SARS-CoV-2 and its Spike protein stimulated  
3 PF4 release from platelets. Summary data of at 3-4 experiments using platelets from  
4 different healthy donors are presented. **B, C and D,** SARS-CoV-2 and its Spike protein  
5 stimulated TNF- $\alpha$ , IL-8 and IL-1 $\beta$  release from platelets. Summary data of 3  
6 experiments using platelets from different healthy donors are presented. Washed  
7 platelets were separated from whole blood of healthy donors and adjusted to  $3 \times 10^8$ /mL  
8 in platelet-poor plasma. Platelets were then challenged with SARS-CoV-2 ( $1 \times 10^5$   
9 PFU), Spike protein (2  $\mu$ g/mL) or thrombin (0.025U/mL) for 1 h. **E, Increased**  
10 **expression of PF4 in plasma from severe and critically severe COVID-19 patients,**  
11 **compared with healthy donors or mild and moderated COVID-19 patients.**  
12 **Concentrations of PF4 were measured in plasma from healthy donors, mild and**  
13 **moderated COVID-19 patients and severe and critically severe COVID-19 patients (n**  
14 **= 5).** PF4 and TNF- $\alpha$ , IL-8 and IL-1 $\beta$  release in supernatant were assessed using  
15 commercial ELISA kits. Statistical analyses were performed using One-way ANOVA,  
16 followed by Tukey's post hoc analysis in (A), (B), (C), (D) and (E). \* $P < 0.05$ ;  
17 \*\* $P < 0.01$ .

18

**A**

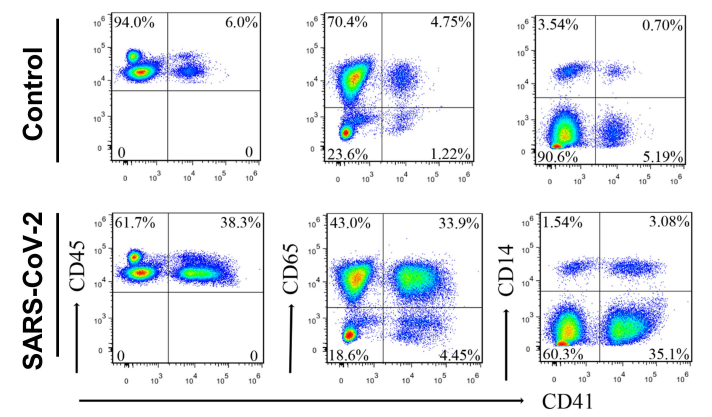

**B**

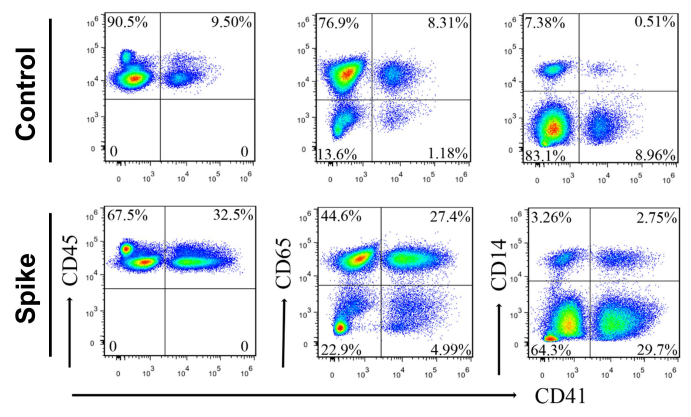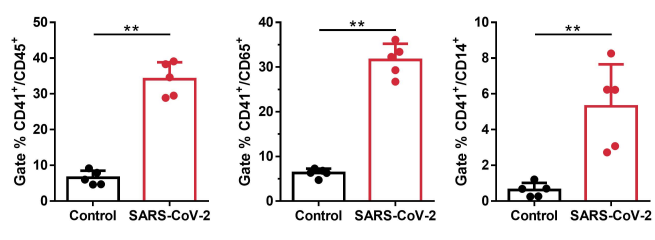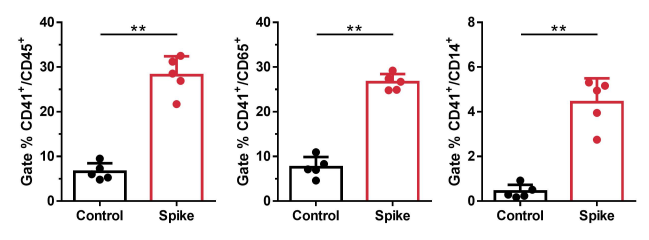



1 **Online Figure 11. SARS-CoV-2 directly stimulates leukocyte-platelet aggregates**  
2 **(LPAs) formation. A and B, SARS-CoV-2 (A) and Spike protein (B) increased**  
3 leukocyte-platelet aggregates (LPAs, CD45<sup>+</sup>CD41<sup>+</sup>), monocyte-platelet aggregates  
4 (MPAs, CD14<sup>+</sup>CD41<sup>+</sup>) and neutrophil-platelet aggregates (NPAs, CD65<sup>+</sup>CD41<sup>+</sup>). After  
5 stimulation with SARS-CoV-2 (1×10<sup>5</sup> PFU) or Spike protein (2 µg/mL) during staining  
6 with different antibodies for about 30 min, red blood cells were removed and the blood  
7 samples were then subjected to flow cytometry. Summary data of 5 experiments using  
8 blood samples from different healthy donors are presented. Statistical analyses were  
9 performed using unpaired two-tailed Student's t test in (A) and (B). \*\**P* < 0.01.

10
